# Supplementary material for: “All-organic” electrode materials toward high-performing rigid to flexible supercapacitor devices
Source: Royal Society of Chemistry journal article supplement (doi:10.1039/d4tc00982g), 2024-01-01
Supplement: d4tc00982g1.pdf [file d4tc00982g1.pdf]

## *Supporting Information*

### **“All-organic” Electrode Material Toward High-Performing Rigid to Flexible Supercapacitor Devices**

Pradeep Sachan, Priyanka Makkar, Ankur Malik, and Prakash Chandra Mondal\*

Department of Chemistry, Indian Institute of Technology Kanpur, Uttar Pradesh-208016, India

E-mail: [pcmondal@iitk.ac.in](mailto:pcmondal@iitk.ac.in) (PCM)

## *Contents*

|                                                                                                                     |     |
|---------------------------------------------------------------------------------------------------------------------|-----|
| 1) Characterization of PDI-AB molecule.....                                                                         | S3  |
| 1.1) NMR spectrum.....                                                                                              | S3  |
| 1.2) Mass spectrum.....                                                                                             | S4  |
| 2) TGA spectrum.....                                                                                                | S4  |
| 3) FT-IR spectra.....                                                                                               | S5  |
| 4) UV-Vis spectrum of PDI and PDI-AB.....                                                                           | S5  |
| 5) Cyclic voltammogram of PDI and PDI-AB .....                                                                      | S6  |
| 6) Preparation of PDI-AB/ITO film through drop-casting.....                                                         | S6  |
| 7) UV-Vis spectrum of PDI-AB in solution and film.....                                                              | S6  |
| 8) Optical microscopy for morphology and thickness measurement.....                                                 | S7  |
| 9) Density functional theory (DFT) study.....                                                                       | S8  |
| 10) Determination of HOMO and LUMO for PDI-AB molecule.....                                                         | S9  |
| 11) GCD data at various mass loading of PDI-AB molecule on ITO<br>electrode.....                                    | S9  |
| 12) Electrochemical performance of SSC devices.....                                                                 | S10 |
| 13) Peak current of PDI-AB molecule for first and second redox peak.....                                            | S10 |
| 14) Cyclic stability of ITO/PDI-AB//PMMA-LiClO <sub>4</sub> -PC//PDI-AB/ITO device with rigid ITO<br>electrode..... | S11 |
| 15) NMR spectrum of PDI-AB after 2000 <sup>th</sup> GCD cycles .....                                                | S12 |
| 16) Mass data of PDI-AB after 2000 <sup>th</sup> GCD cycles .....                                                   | S12 |
| 17) X-ray photoelectron spectra of PDI-AB after 2000 <sup>th</sup> GCD cycles .....                                 | S13 |
| 18) FE-SEM image of PDI-AB before and after 2000 <sup>th</sup> GCD cycles.....                                      | S13 |
| 19) Log j vs. Log $\nu$ (b-value) plots.....                                                                        | S14 |
| 20) j (V). $\nu^{-1/2}$ vs. $\nu^{1/2}$ plot .....                                                                  | S15 |
| 21) Electrochemical impedance spectra for SSC device .....                                                          | S15 |
| 22) Cyclic stability and different bend angles measurement .....                                                    | S16 |
| 23) Electrochemical parameters for equivalent circuit model.....                                                    | S17 |
| 24) Photocurrent measurements .....                                                                                 | S18 |
| 25) References.....                                                                                                 | S19 |

# 1) Characterization of PDI-AB molecule:

## 1.1) $^1\text{H}$ and $^{13}\text{C}\{^1\text{H}\}$ NMR spectrum:

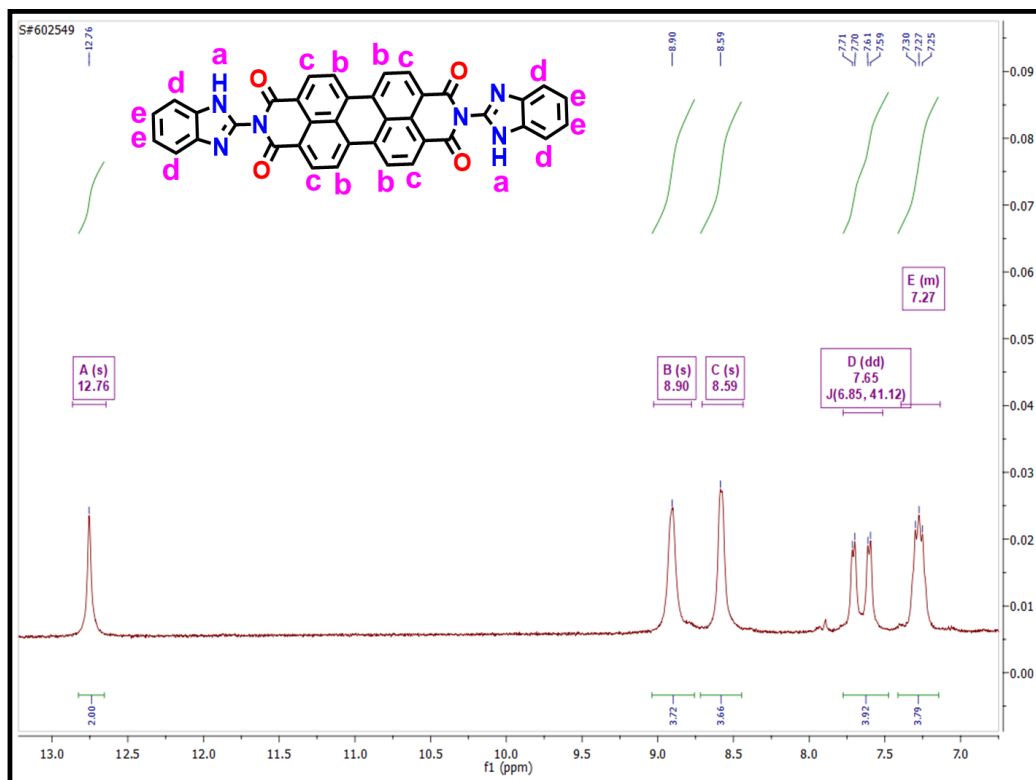

**Figure S1:**  $^1\text{H}$  NMR spectrum of PDI-AB recorded in DMSO- $d_6$ . Peak positions in the spectrum were assigned relative to the TMS reference, and integration was conducted by treating the NH peak as equivalent to one hydrogen atom.

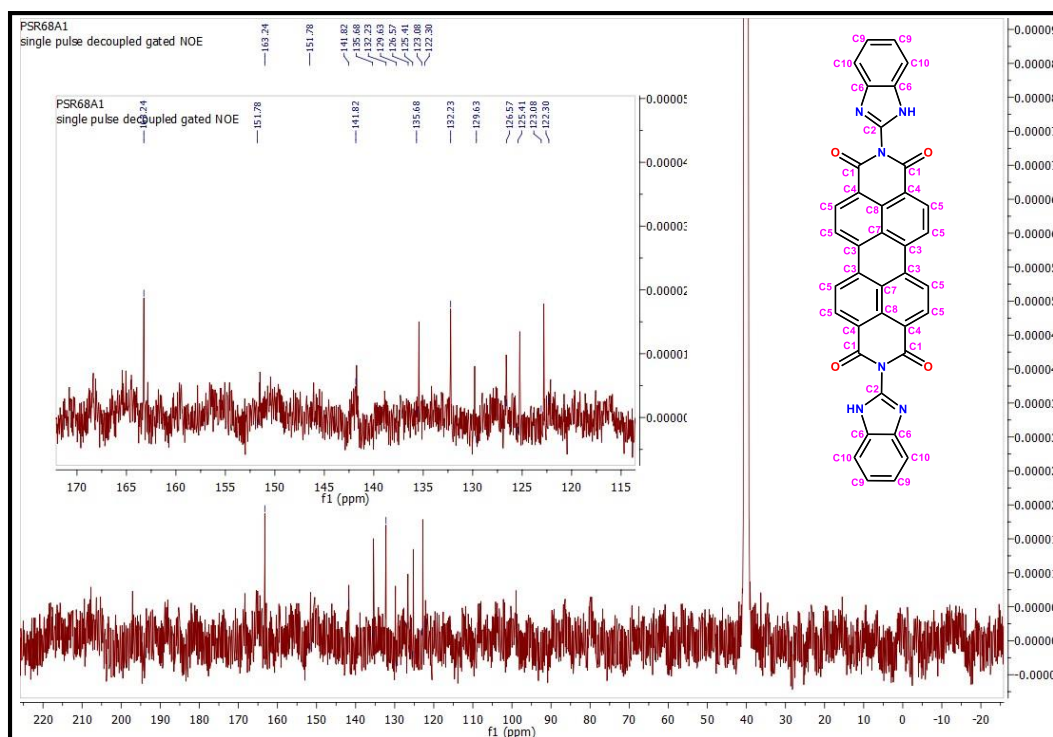

**Figure S2:**  $^{13}\text{C}\{^1\text{H}\}$  NMR spectrum of PDI-AB recorded in  $\text{DMSO-d}_6$ . Peak positions in the spectrum were assigned relative to the TMS reference.

### 1.2) Mass spectrum:

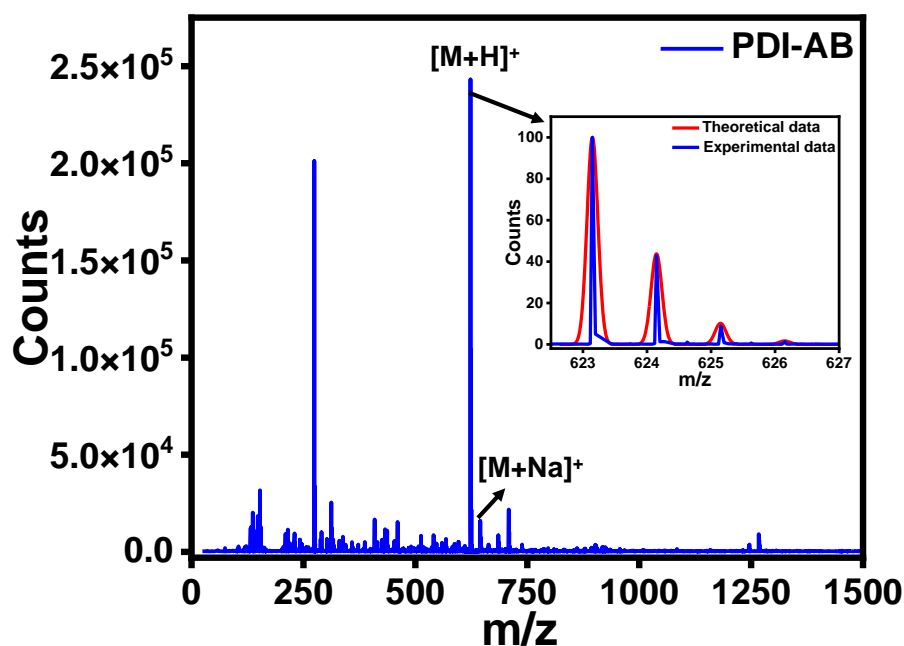

**Figure S3:** HRMS (ESI-MS, positive mode) of PDI-AB mass spectrum. The full-scan mass spectra revealed an isotope pattern match at 623.96 (m/z), as displayed in the zoomed image with intensity ratio (1:0.4:0.1:0.05).

### 2. TGA spectrum:

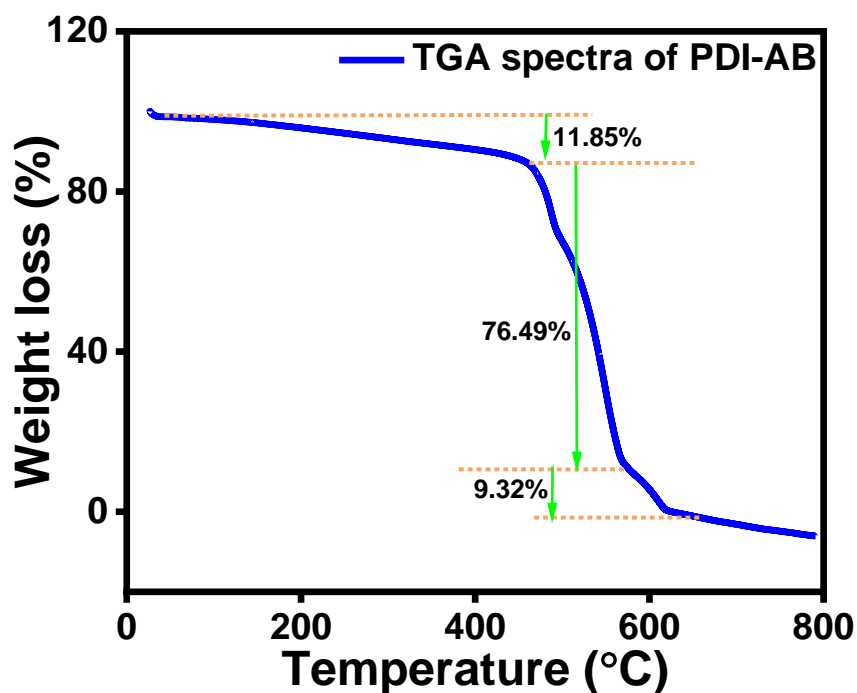

**Figure S4:** TGA spectrum of PDI-AB molecule in terms of % of weight loss by increasing temperature.

### 3. FT-IR spectra:

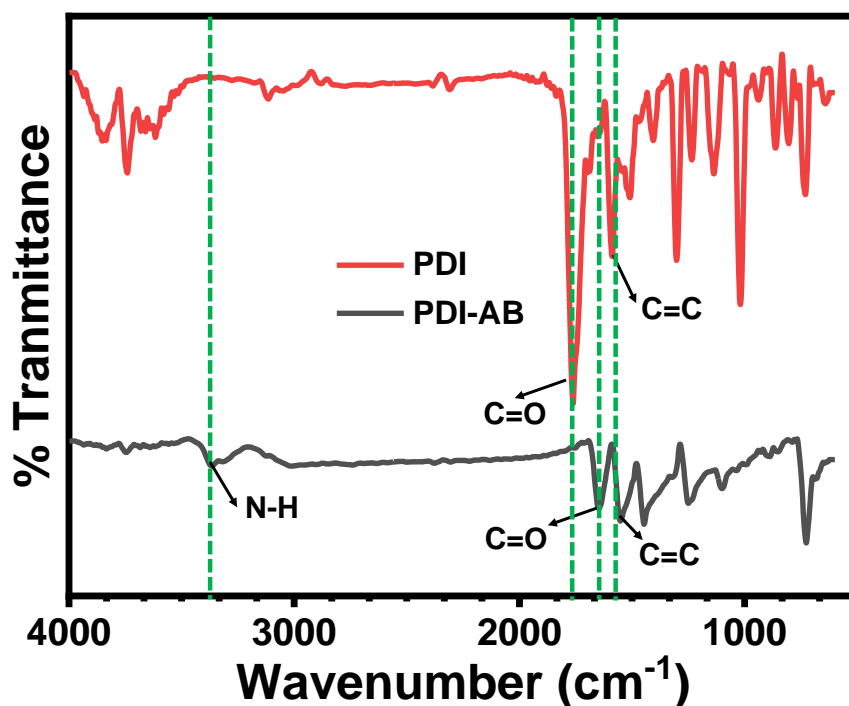

**Figure S5:** Comparison of FT-IR spectrum of PDI molecule (Red) and PDI-AB molecule (Black). The characteristic stretching frequencies are highlighted.

### 4. UV-Vis spectrum of PDI and PDI-AB:

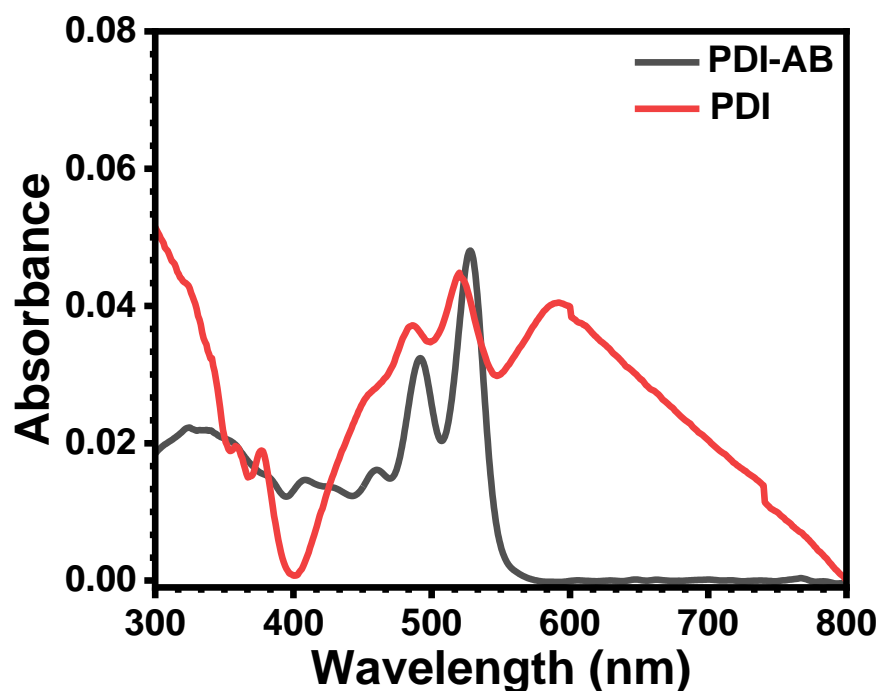

**Figure S6:** Comparison of UV-Vis spectrum of PDI-AB (black), and PDI (red) recorded in diluted solution (DMF as solvent).

### 5. Cyclic voltammogram of PDI and PDI-AB:

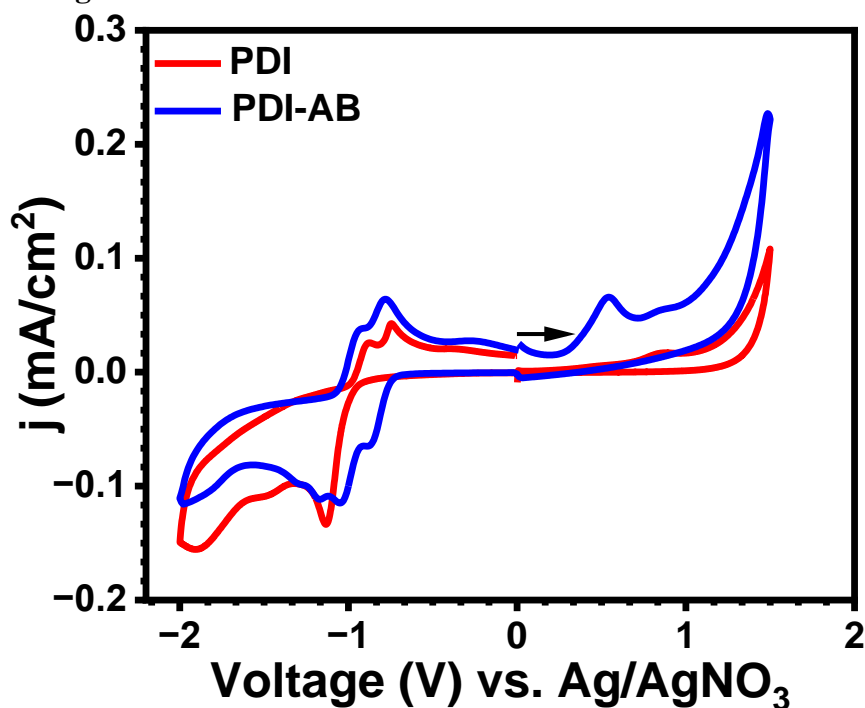

**Figure S7:** Cyclic voltammograms of PDI and PDI-AB, where ITO, Ag/AgNO<sub>3</sub>, and a Pt wire as a working, reference, and counter electrodes, respectively. The CV was recorded at a scan rate of 100 mV/s.

### 6. Preparation of PDI-AB/ITO film through drop-casting:

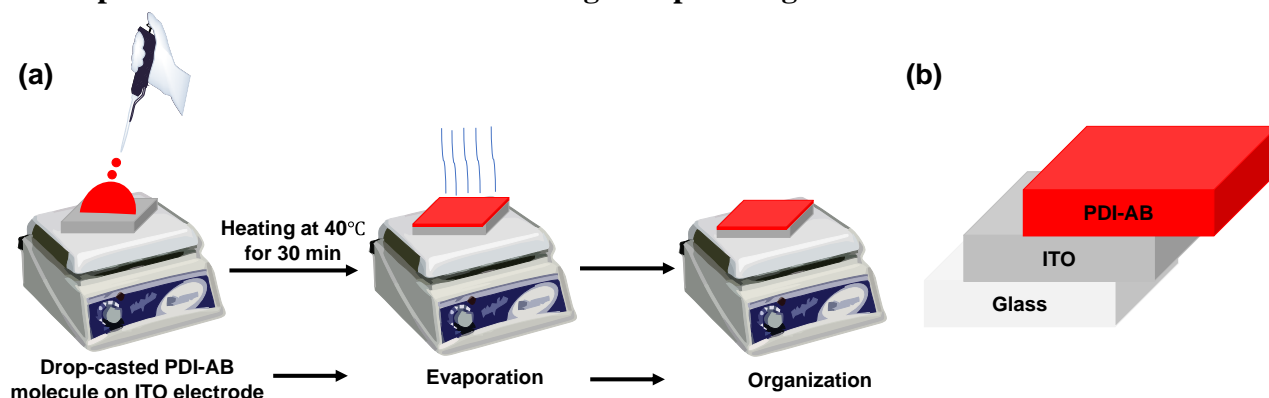

**Figure S8:** Stepwise representation to prepare PDI-AB/ITO electrode made via drop-casting method.

### 7. UV-Vis spectrum of PDI-AB in solution and film:

The UV-Vis spectrum of PDI-AB was recorded in DMF solvent and PDI-AB/ITO. The absorption spectrum of thin films displays broad and blue-shifted (**Figure S9**).

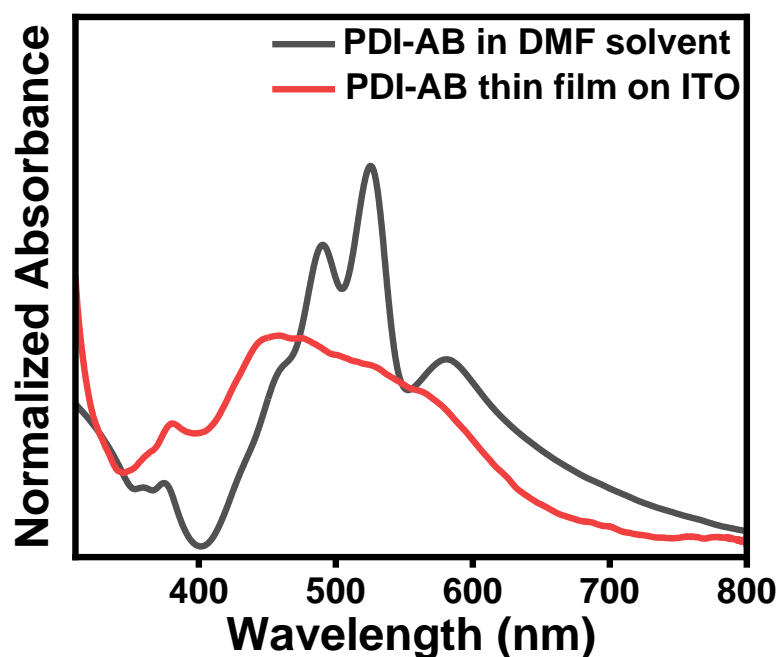

**Figure S9:** Comparison of UV-Vis absorption spectrum of PDI-AB in DMF solution (Black) and thin film on ITO electrode (Red).

**8. Optical microscopy for morphology and thickness measurement:**

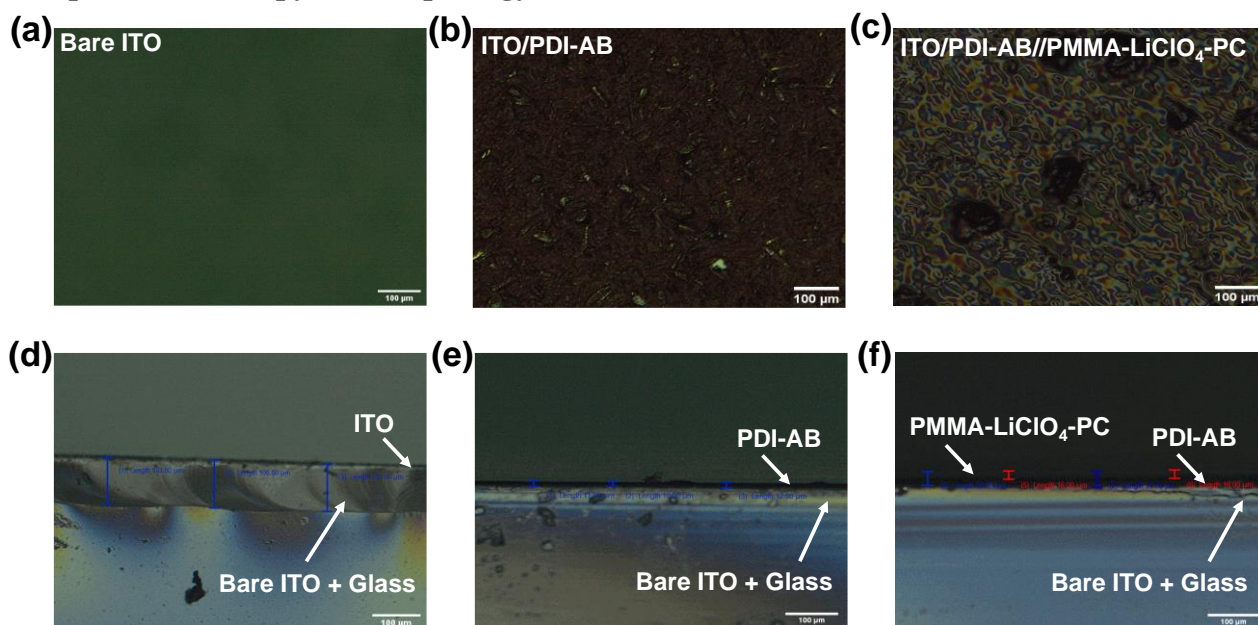

**Figure S10:** Morphology and cross-sectional images to deduce the material morphology and thickness of drop-casted PDI-AB and PDI-AB//PMMA-LiClO<sub>4</sub>-PC as compared to bare ITO.

**Table S1:** The average thicknesses of the respective layers are provided in the table.

| S. No. | Material                    | Thickness (T <sub>1</sub> , μm) | Thickness (T <sub>2</sub> , μm) | Thickness (T <sub>3</sub> , μm) | Average thickness (T <sub>A</sub> , μm) |
|--------|-----------------------------|---------------------------------|---------------------------------|---------------------------------|-----------------------------------------|
| 1.     | PDI-AB                      | 11                              | 10                              | 12                              | 10.15±0.63                              |
| 2.     | PMMA-LiClO <sub>4</sub> -PC | 15                              | 16                              | 16                              | 15.66±0.57                              |

**9. Density functional theory (DFT) study:** DFT calculations were performed to optimize the model structures and to predict the energy levels frontier orbitals of PDI and PDI-AB molecule by using B3LYP functional and 6-31+G(d,p) basis set, as implemented in the Gaussian 09 program.<sup>1</sup> Graphical output files were generated with the help of the GaussView program (version 6.0) (**Figure S11**). Furthermore, we investigated the Highest Occupied Molecular Orbital (HOMO) and Lowest Unoccupied Molecular Orbital (LUMO) energies, band gap ( $E_g$ ), electron affinity (EA), and ionization potential (IP) of both PDI and PDI-AB molecules. In addition to modifying the HOMO-LUMO levels of the molecule, the introduction of substituents (2-Aminobenzimidazole) to imide position induces a twist in the perylene ring. To mitigate electrostatic repulsions between the substituents and hydrogen atoms on opposite bay positions, the perylene ring stabilizes into a twisted geometry. A schematic representation of the dihedral angles formed between 2-Aminobenzimidazole and perylene rings is presented in the main text **Figure 1c**, illustrating angles of  $\theta_1$  ( $88.19^\circ$ ) and  $\theta_2$  ( $91.73^\circ$ ). Changes in these dihedral angles in a neutral PDI derivative can influence the relative energies of its reduced forms, such as the radical anion and dianion.

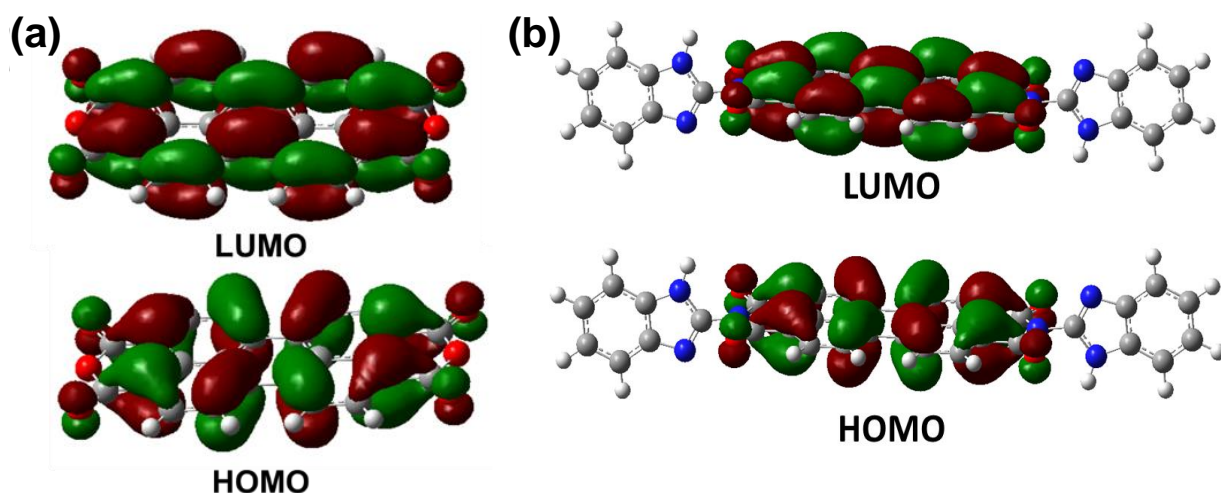

**Figure S11:** HOMO and LUMO contours of (a) PDI molecule, and (b) PDI-AB molecule.



### 10. Determination of HOMO and LUMO for PDI-AB molecule:

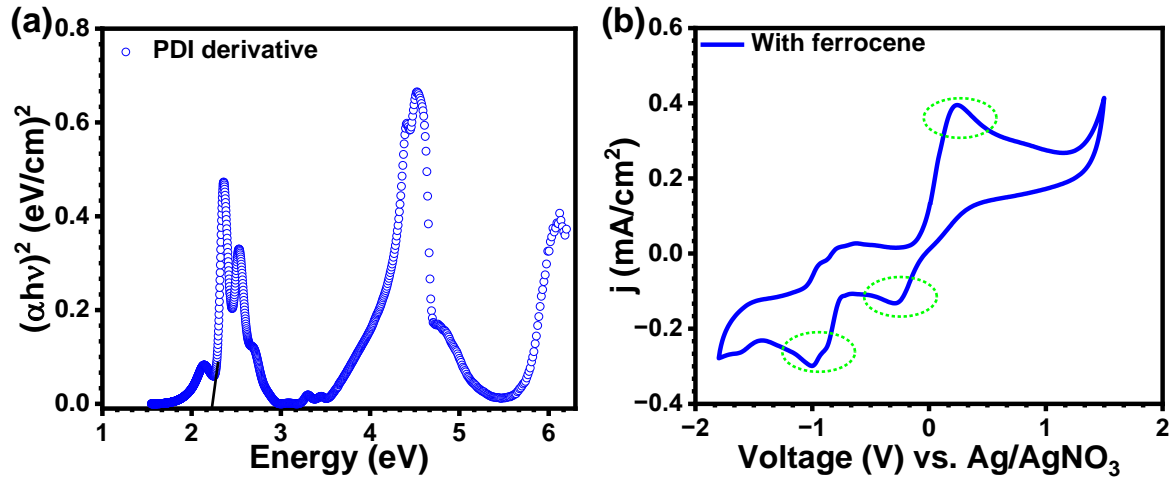

**Figure S12:** (a) Tauc plot of PDI-AB in dimethylformamide solution, and (b) CVs of PDI-AB in dimethylformamide solution with the presence of ferrocene, where ITO, Ag/AgNO<sub>3</sub>, and a Pt wire as a working, reference, and counter electrodes, respectively. The CV was recorded at a scan rate of 50 mV/s.

### 11. GCD data at various mass loading of PDI-AB molecule on ITO electrode:

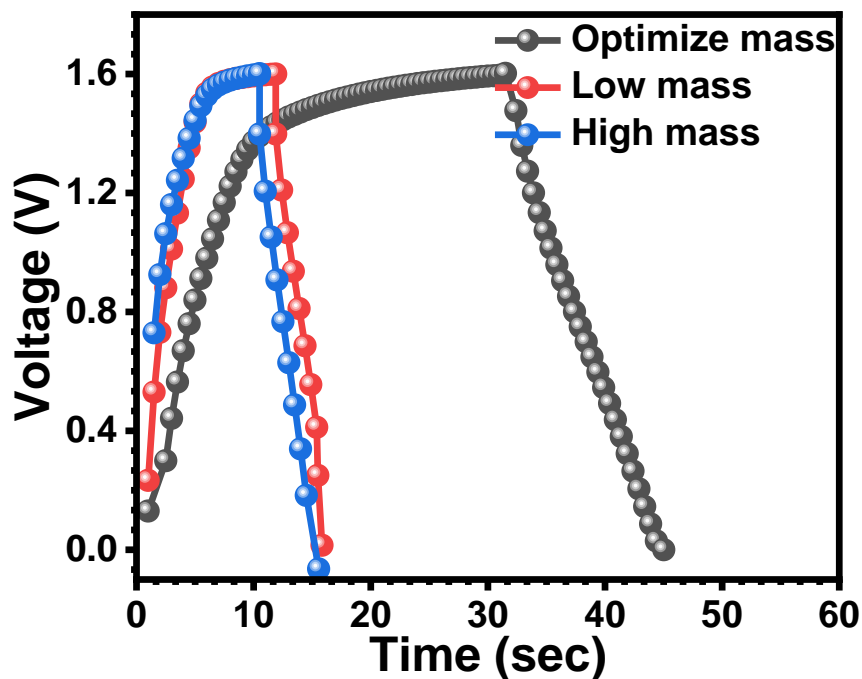

**Figure S13:** GCD curves of ITO/PDI-AB//PMMA-LiClO<sub>4</sub>-PC//PDI-AB/ITO device at a current density of 1 mA/g with various mass loading.

**Table S2: Specific capacitance (C<sub>s</sub>) values with varying mass loading**

| S. No. | Material                                            | Mass loading | Specific capacitance (C <sub>s</sub> ) (mF/g) |
|--------|-----------------------------------------------------|--------------|-----------------------------------------------|
| 1.     | ITO/PDI-AB//PMMA-LiClO <sub>4</sub> -PC//PDI-AB/ITO | 1 mg         | 12.83±1.11                                    |
| 2.     | ITO/PDI-AB//PMMA-LiClO <sub>4</sub> -PC//PDI-AB/ITO | 2 mg         | 33.25±0.45                                    |
| 3.     | ITO/PDI-AB//PMMA-LiClO <sub>4</sub> -PC//PDI-AB/ITO | 3 mg         | 12.87±0.36                                    |

## 12. Electrochemical performance of SSC devices:

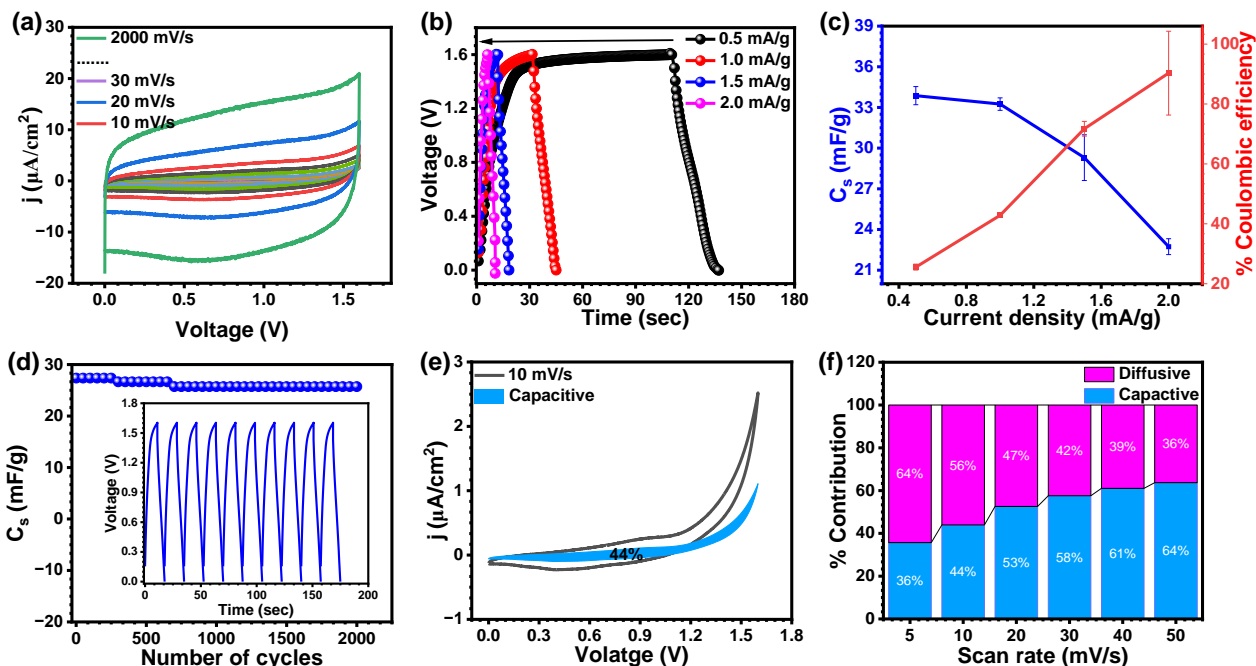

**Figure S14:** (a) Cyclic voltammogram at varying scan rates (5-2000 mV/s), (b) GCD curves at varying current density, (c) Variation of current density vs.  $C_s$  and columbic efficiency, (d) GCD cycle stability up to 2000 cycles at 1.5 mA/g, (e) CV at 10 mV/s showing capacitive (blue) and diffusion-controlled (white) charge storage process, and (f) Diffusion controlled and non-diffusion-controlled contribution to total  $C_s$  at various scan rates for rigid ITO/PDI-AB//PMMA-LiClO<sub>4</sub>-PC//PDI-AB/ITO SSC device.

## 13. Peak current of PDI-AB molecule for first and second redox peak:

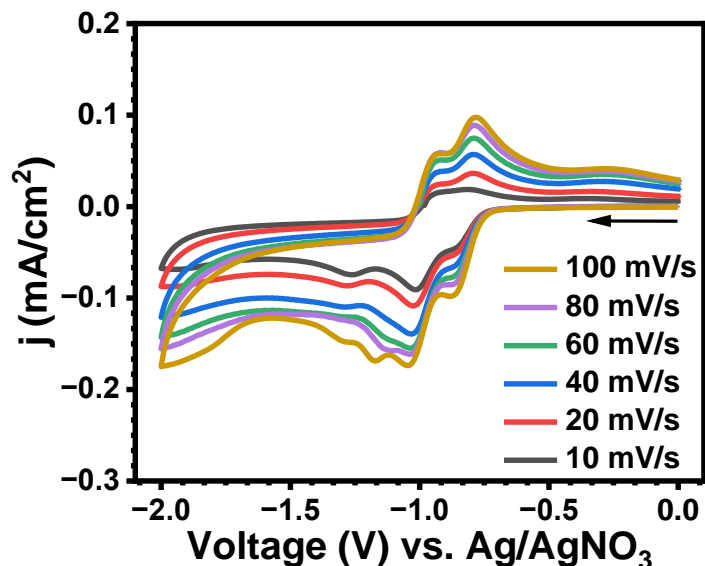

**Figure S15:** Cyclic voltammograms of PDI-AB (1 mM) and LiClO<sub>4</sub> as a supporting electrolyte (3 mM) recorded in dimethylformamide at different scan rates, where ITO as a working electrode, Pt wire as a counter electrode, and Ag/AgNO<sub>3</sub> as a reference electrode.

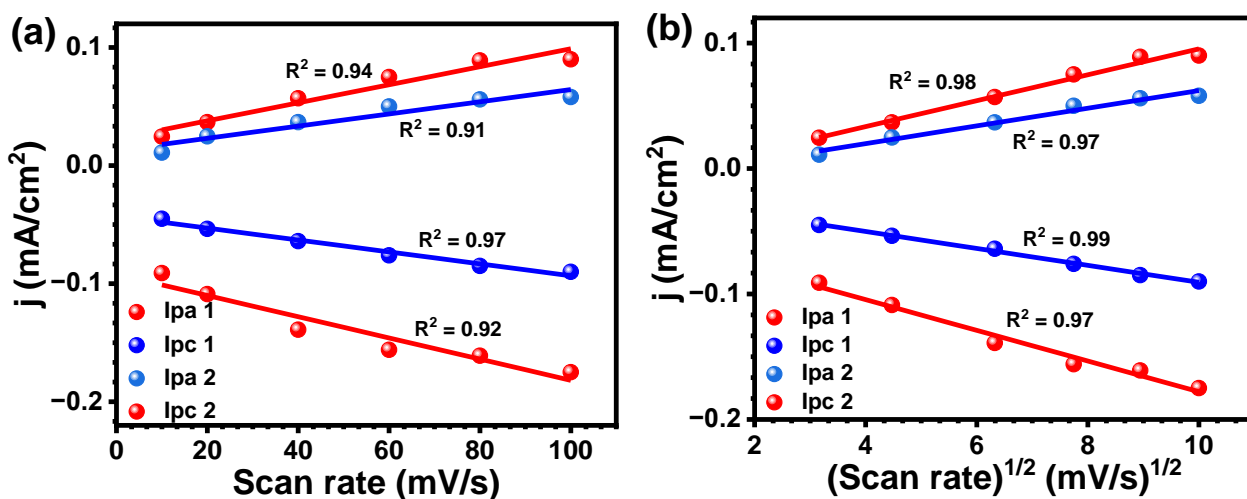

**Figure S16:** The relationship between peak current with (a) scan rate, and (b) square root of scan rate.

**14. Cyclic stability of ITO/PDI-AB//PMMA-LiClO<sub>4</sub>-PC//PDI-AB/ITO device with rigid ITO electrode:**

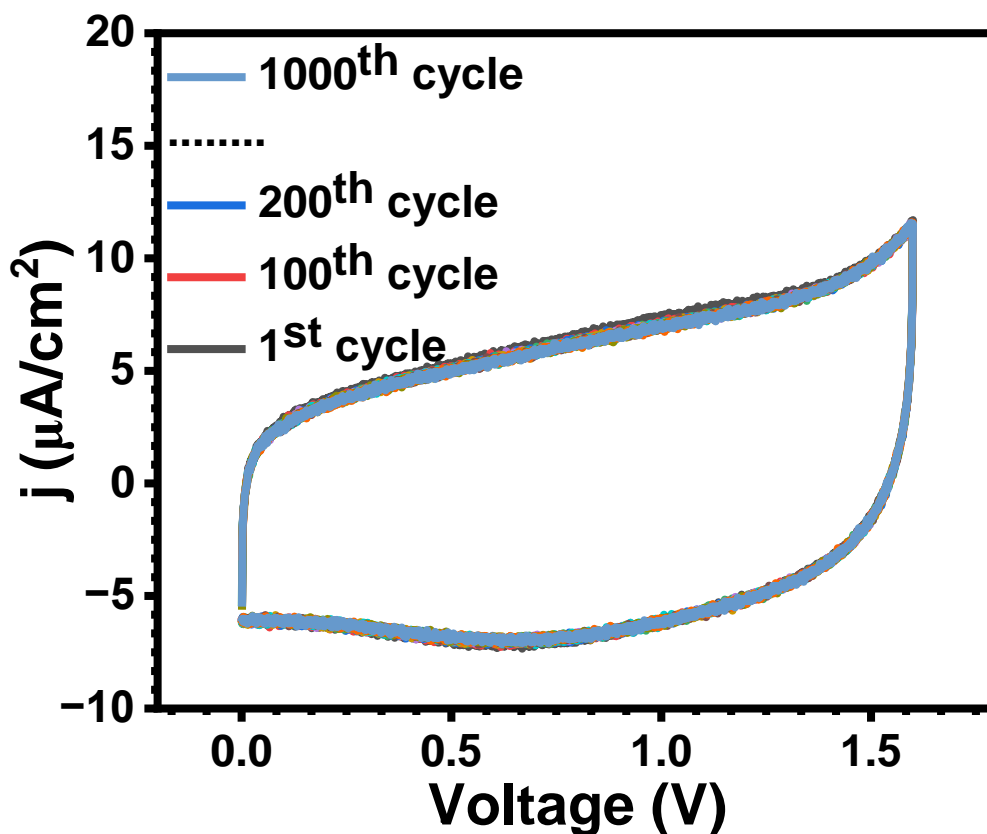

**Figure S17:** JV hysteresis loop of ITO/PDI-AB//PMMA-LiClO<sub>4</sub>-PC//PDI-AB/ITO device with 0 to +1.6 V potential window at 1000 mV/s scan rates up to 1000 cycles.

**15. NMR spectrum of PDI-AB after 2000<sup>th</sup> GCD cycles:** The <sup>1</sup>H NMR spectrum of the PDI-AB molecule was recorded in DMSO-d<sub>6</sub> after completing 2000<sup>th</sup> GCD cycles at a current density of 1.5 mA/g to assess the stability of the organic material. This spectrum was compared with a previous <sup>1</sup>H NMR spectrum of the same molecule. The <sup>1</sup>H NMR spectrum of PDI-AB (green) after GCD cycling includes additional peaks in the non-aromatic region, which are attributed to the presence of PMMA-LiClO<sub>4</sub>-PC and Nafion in the PDI-AB sample.

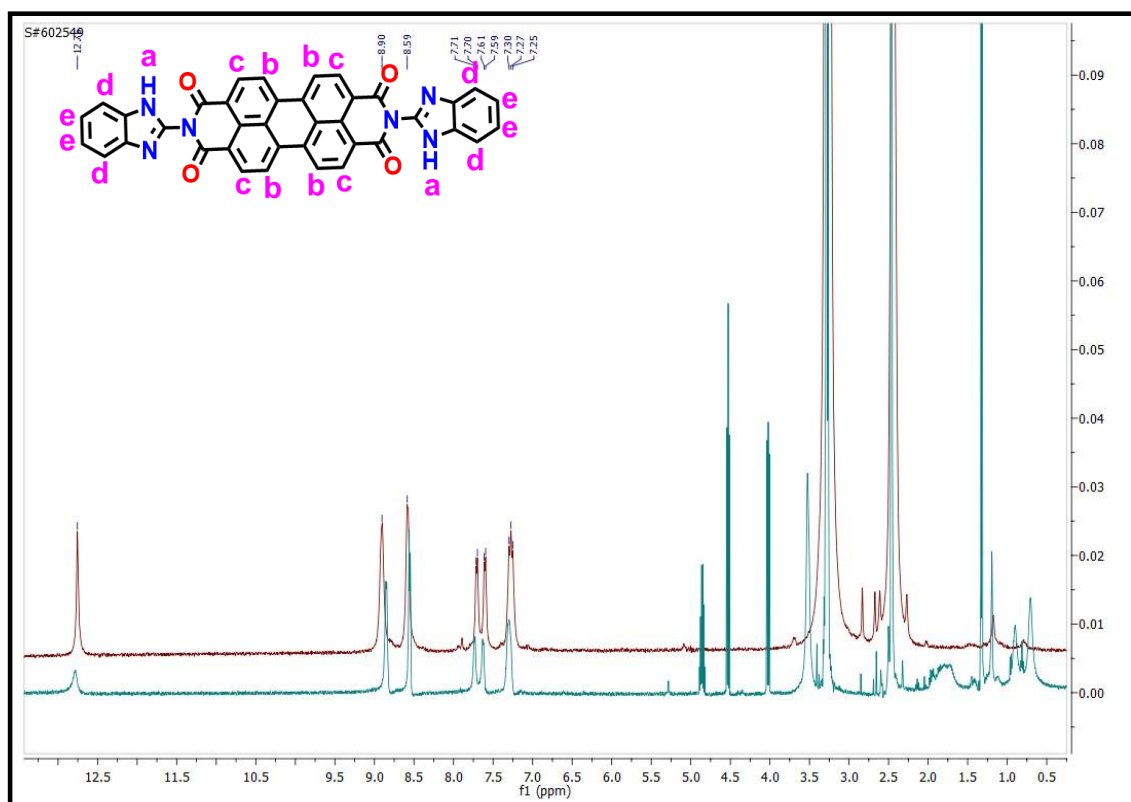

**Figure S18:** Comparison of <sup>1</sup>H NMR spectrum of PDI-AB molecule before (red) and after (green) GCD cycles (DMSO-d<sub>6</sub>).

**16. Mass spectrum of PDI-AB after 2000<sup>th</sup> GCD cycles:**

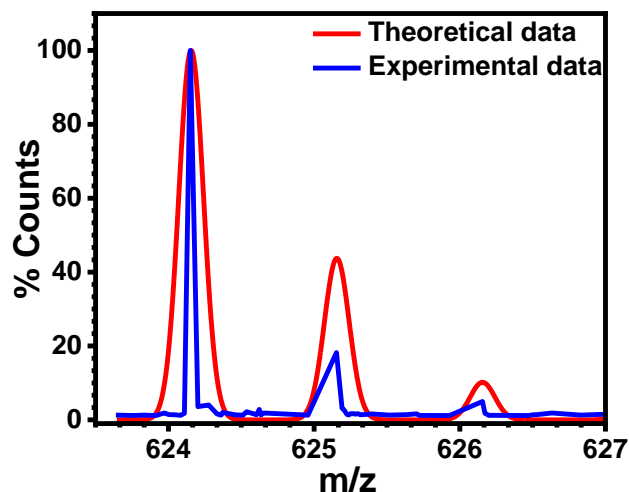

**Figure S19:** HRMS (ESI-MS positive mode) of PDI-AB mass spectra after 2000<sup>th</sup> GCD cycles.

### 17. X-ray photoelectron spectra analysis of PDI-AB after 2000<sup>th</sup> GCD cycles:

X-ray photoelectron spectroscopy measurements were performed on a device after 2000 GCD cycles, which contains PDI-AB, Nafion, and PMMA-LiClO<sub>4</sub>-PC. Our primary objective was to identify and assign the PDI-AB-related peaks within the spectra.

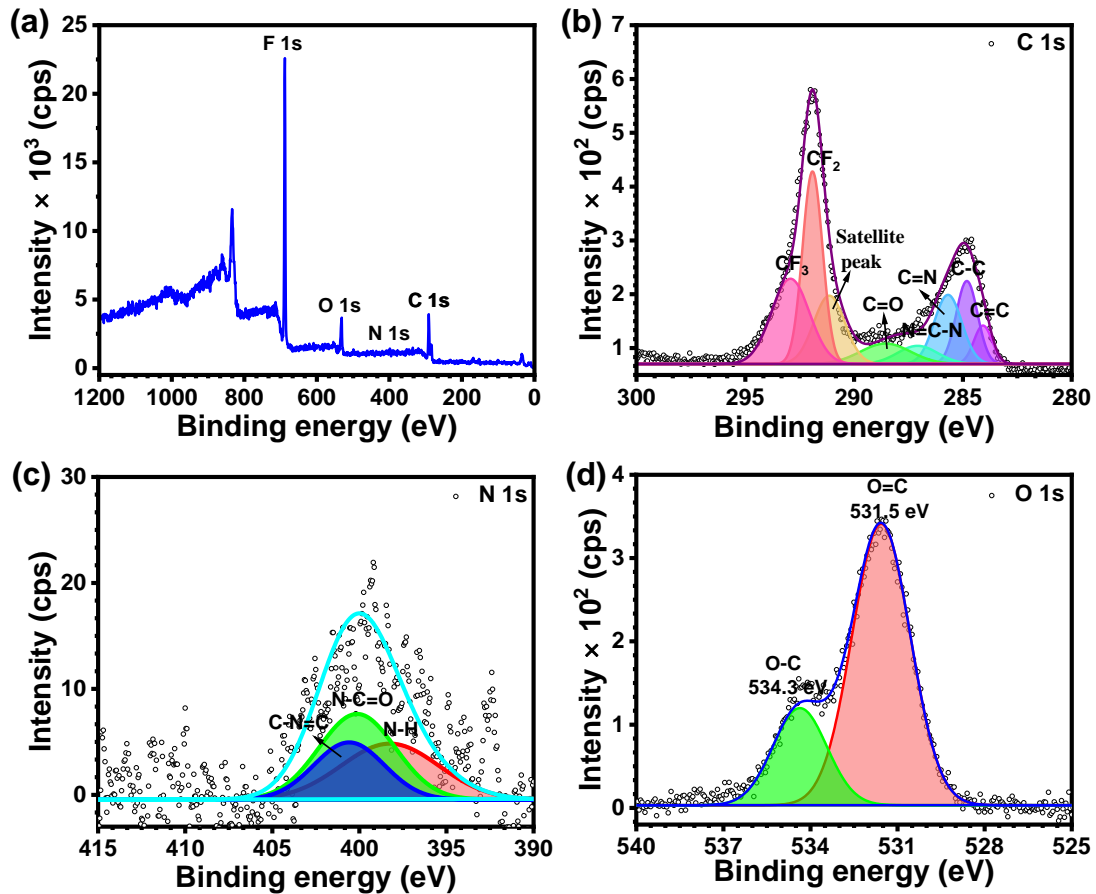

**Figure S20:** X-ray photoelectron spectroscopy measurements results after 2000<sup>th</sup> cycles. (a) Full survey scan of PDI-AB/ITO confirming the presence of C 1s, N 1s, and O 1s, (b) XPS spectra of C 1s orbital, (c) XPS spectra of N 1s orbital, and (d) XPS spectra of O 1s.

### 18. FE-SEM images of PDI-AB before and after 2000<sup>th</sup> GCD cycles:

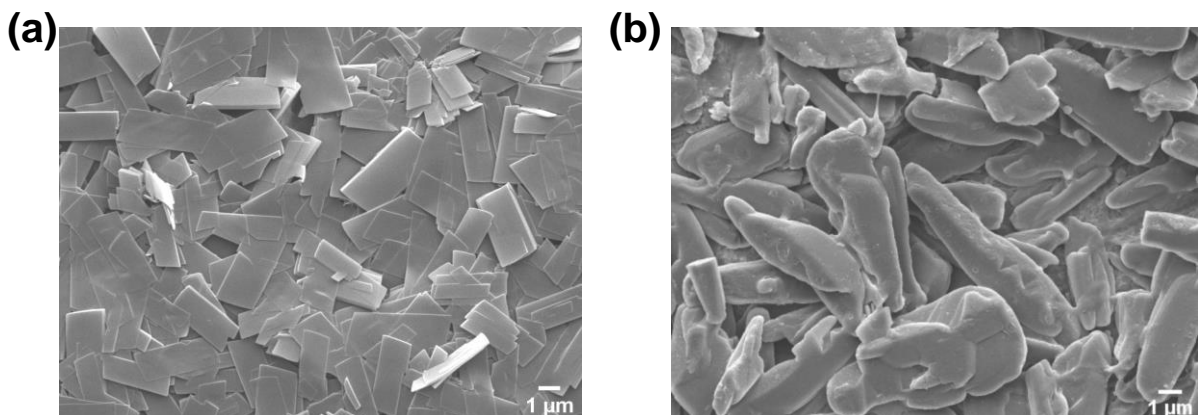

**Figure S21:** FESEM image of PDI-AB/ITO (a) Before GCD cycles, and (b) After 2000<sup>th</sup> GCD cycles at a 1.5 mA/g current density.

**19. Log j vs. Log  $\nu$  (b-value) plots:** The plot of  $\log j$  vs  $\log \nu$  for different voltage ranges from +0.25 V – (+1.25) V. The b-values are obtained through linear fitting and the b-values are in the range of 0.99 – 0.66 which lies in between the SCs and the batteries, suggesting the coexistence of diffusive and capacitive charge storage mechanism at the electrode/electrolyte interface and confirms the capacitive and diffusive nature of the supercapattery.<sup>2,3</sup>

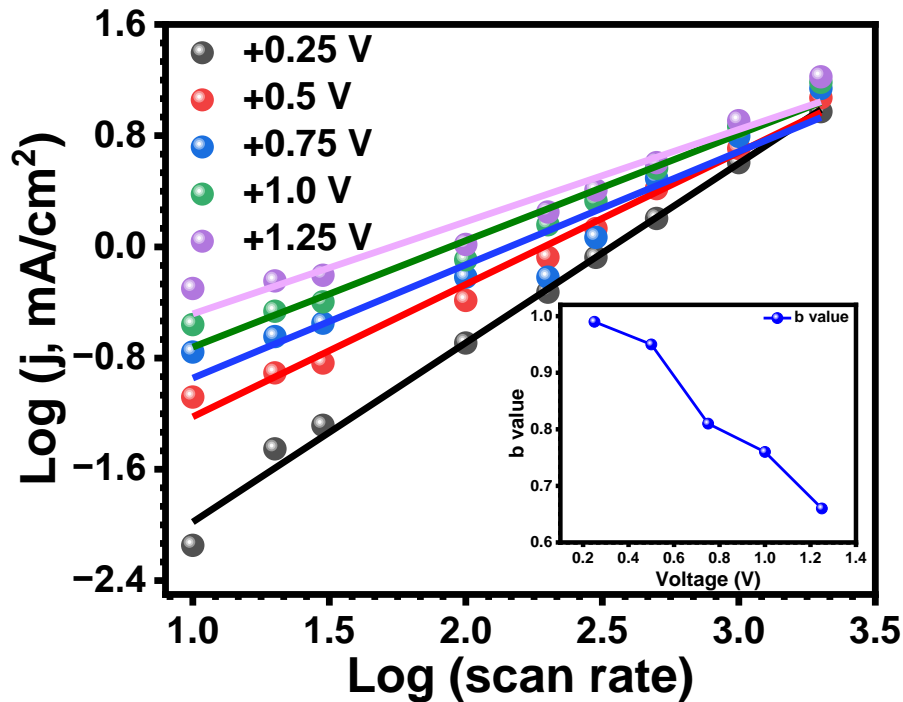

**Figure S22:** Log j vs. Log  $\nu$  (b-value) plots at different voltages.

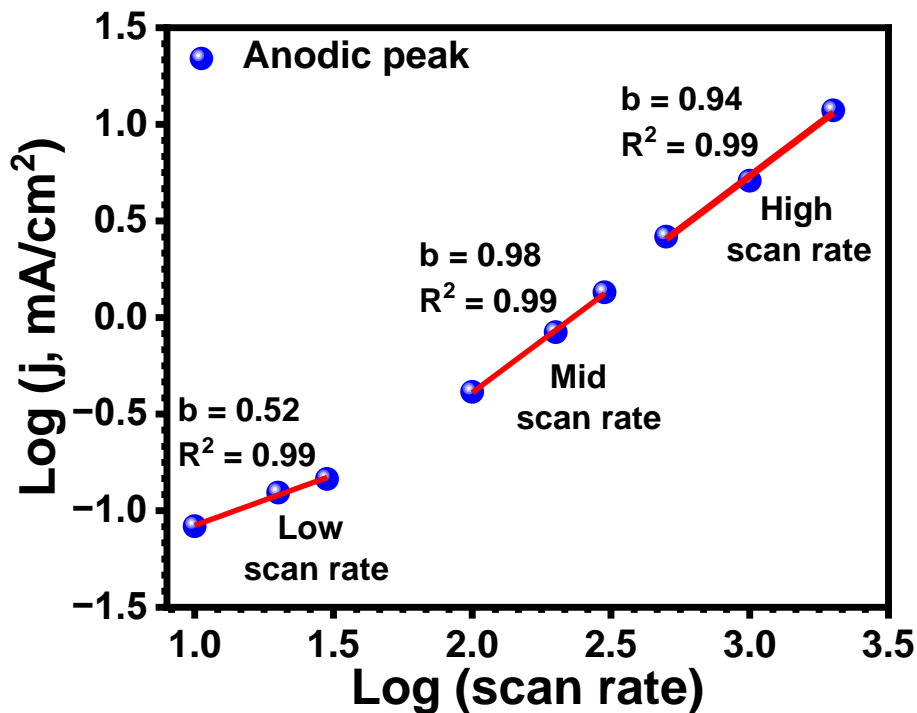

**Figure S23:** Log j vs. Log  $\nu$  (b-value) plots at different +0.5 V voltage.

20.  $j(V) \cdot v^{-1/2}$  vs.  $v^{1/2}$  plot:

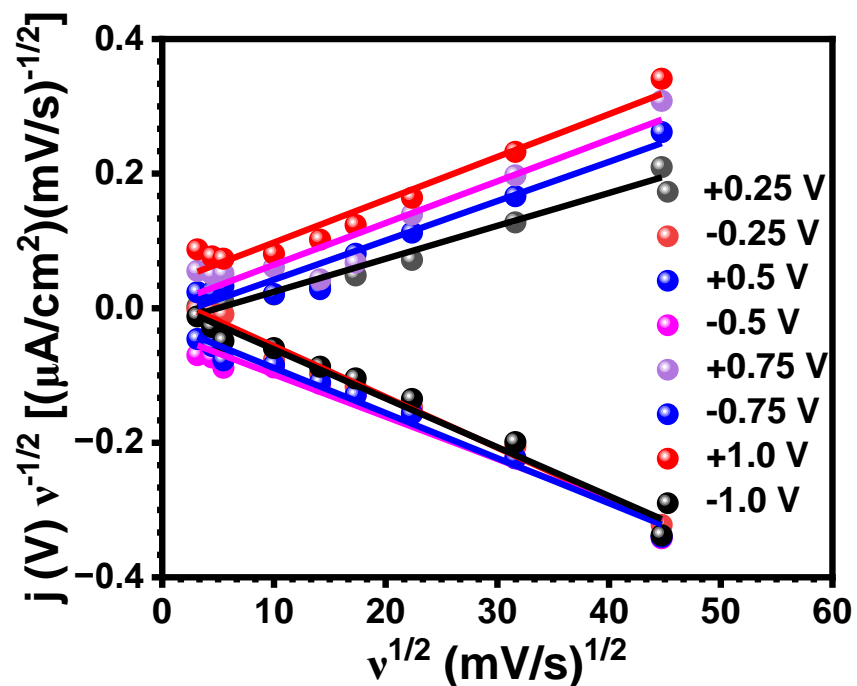

**Figure S24:** Linear fitting of the  $k_1$  and  $k_2$  parameters in the sweep rate range of 10–2000  $\text{mV s}^{-1}$  ( $R^2$  value lies between 0.94 to 0.98).

## 21. Electrochemical Impedance Spectra for SSC device:

**Table S3.** EIS fitted parameters for rigid ITO/PDI-AB//PMMA-LiClO<sub>4</sub>-PC//PDI-AB/ITO SSC device.

| Parameters | $R_{CT}$ ( $\Omega$ ) | $R_{MJ}$ ( $\text{K}\Omega$ ) | $C_{MJ}$ ( $\mu\text{F}$ ) | $Z_w$         | CPE                                      |
|------------|-----------------------|-------------------------------|----------------------------|---------------|------------------------------------------|
| PDI-AB     | $33.4 \pm 8.8$        | $4.4 \pm 2.5$                 | $10.4 \pm 1.2$             | $3.4 \pm 2.9$ | $Y_0 = 14.08 \times 10^{-6}$ ,<br>N=0.91 |

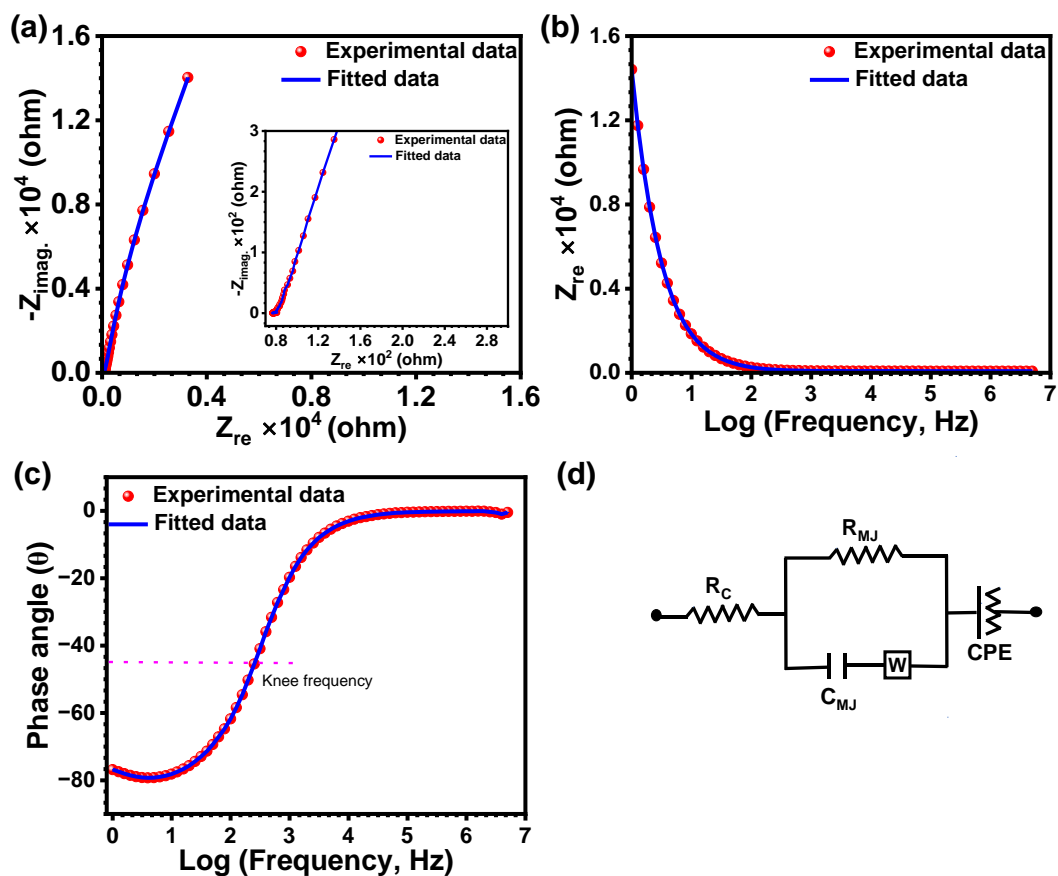

**Figure S25:** (a) Nyquist plot (experimental and fitted data), Bode plots, (b)  $|Z|$  vs frequency, (c) phase angle vs frequency, and (d) The Randles equivalent fitted circuit model of the rigid ITO/PDI-AB//PMMA-LiClO<sub>4</sub>-PC//PDI-AB/ITO SSC device.

## 22. Cyclic stability and different bend angles measurement:

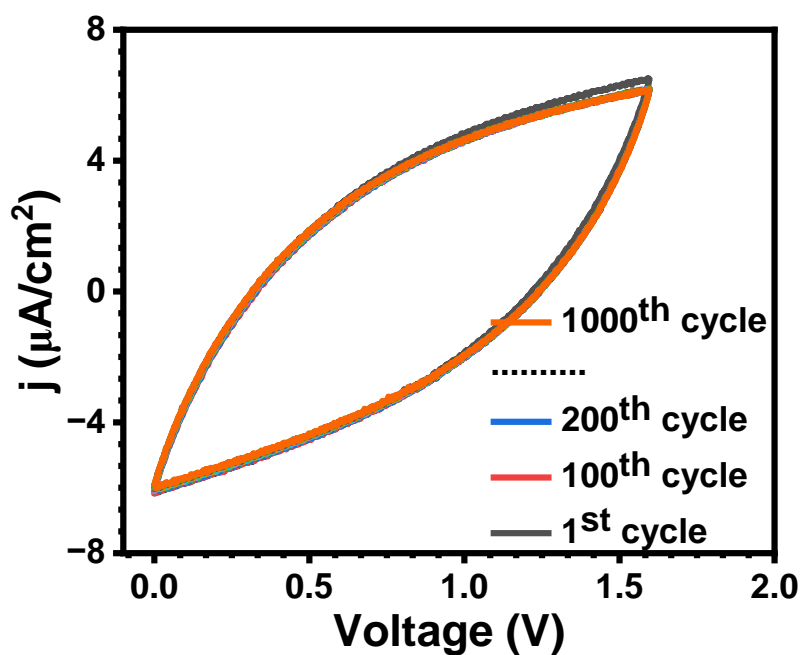

**Figure S26:** JV hysteresis loop of ITO/PDI-AB//PMMA-LiClO<sub>4</sub>-PC//PDI-AB/ITO device with flexible ITO, potential range 0 to +1.6 V at 1000 mV/s scan rates up to 1000 cycles.



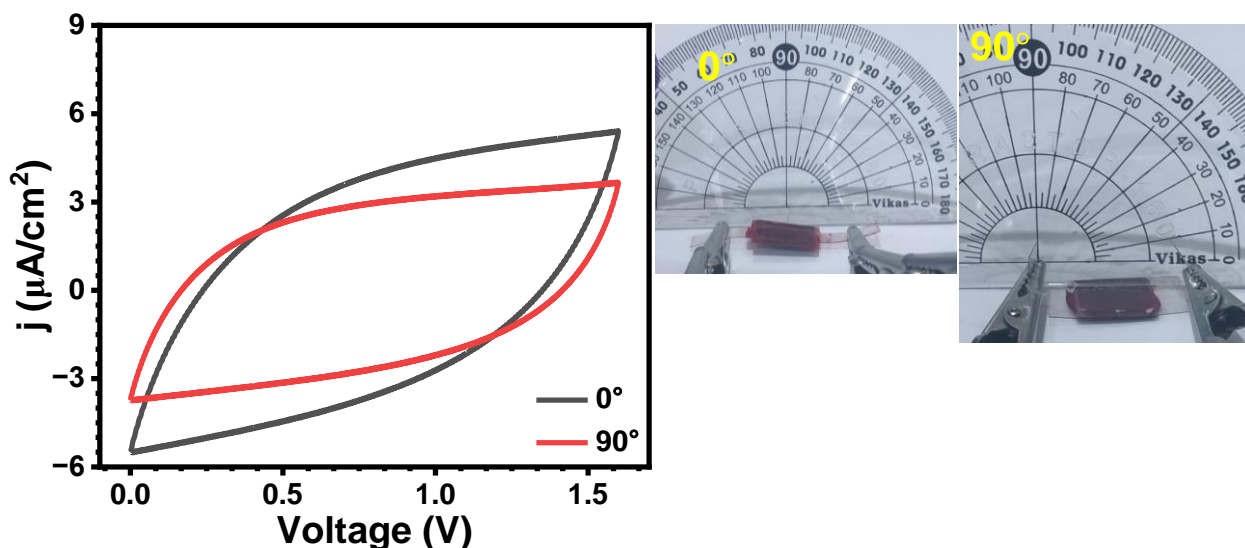

**Figure S27:** JV hysteresis loop of ITO/PDI-AB//PMMA-LiClO<sub>4</sub>-PC//PDI-AB/ITO device with flexible ITO at different bend angles, potential range 0 to +1.6 V at 1000 mV/s scan rates.

**Table S4: Capacitance comparison of PDI-AB with previous reports.**

| S. No. | Materials                                     | Capacitance                            | References |
|--------|-----------------------------------------------|----------------------------------------|------------|
| 1.     | P(PDI-alt-BDT)                                | 35 (mF/g)                              | 4          |
| 2.     | Naphthalene diimide pyridine/GF*              | 132 (F/g)                              | 5          |
| 3.     | Perylene diimide-pyridine/GF*                 | 197 (F/g)                              | 5          |
| 4.     | P(NDI2OD-T2 vinylene linked (P2))             | 40 (F/g)                               | 6          |
| 5.     | PTCDA                                         | 63 mF/g                                | 7          |
| 6.     | benzoic-PDI                                   | 98.4 mF/g                              | 8          |
| 7.     | PDI-AB rigid device<br>PDI-AB flexible device | 33.87±0.66 (mF/g)<br>32.68±0.44 (mF/g) | This work  |

\* GF = Graphite foil

### 23. Electrochemical parameters for equivalent circuit model:

**Table S5. EIS fitted parameters for flexible ITO/PDI-AB//PMMA-LiClO<sub>4</sub>-PC//PDI-AB/ITO SSC device**

| Angle | R <sub>CT</sub> (KΩ) | R <sub>MJ</sub> (Ω) | C <sub>dl</sub> (nF) | W                             | CPE                                                |
|-------|----------------------|---------------------|----------------------|-------------------------------|----------------------------------------------------|
| 0°    | 1.59±9.8             | 234.1±22.9          | 180.8±33.05          | 245±52.8 ×10 <sup>-6</sup>    | Y <sub>0</sub> =11.51×10 <sup>-6</sup> ,<br>N=0.97 |
| 90°   | 1.59±9.7             | 227.1±22.9          | 184.9±34.63          | 235.5±47.78 ×10 <sup>-6</sup> | Y <sub>0</sub> =12.18×10 <sup>-6</sup> ,<br>N=0.97 |

## 24. Photocurrent measurements:

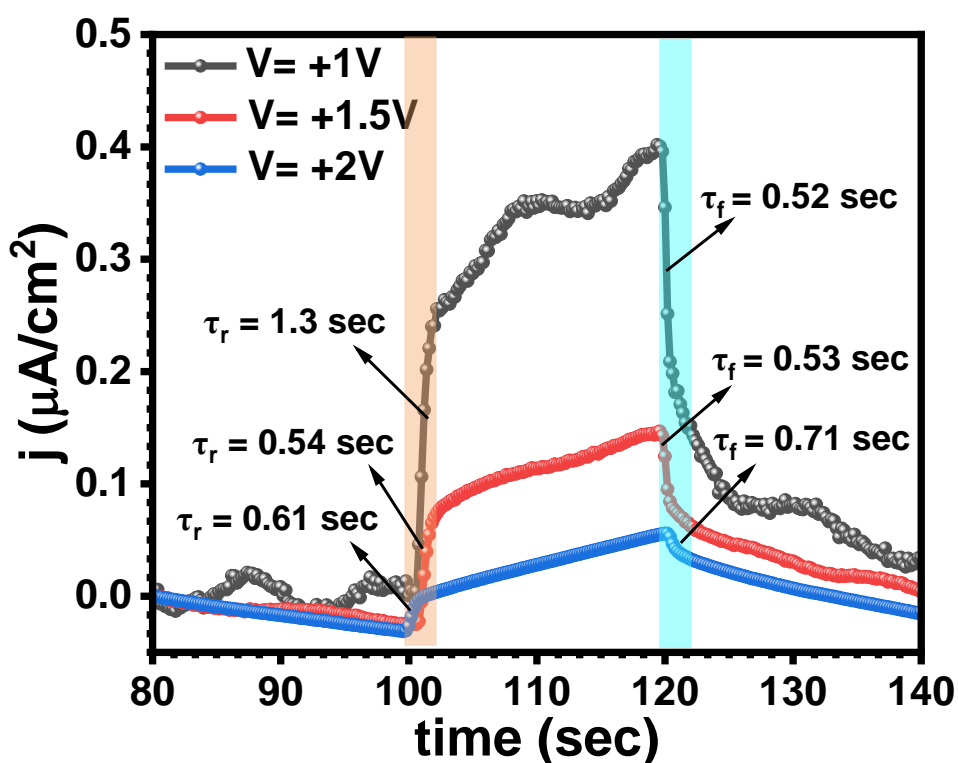

**Figure S28:** Comparison photocurrent measurement of ITO/PDI-AB//PMMA-LiClO<sub>4</sub>-PC//PDI-AB/ITO at three different voltages (+1, +1.5, +2V).

**Table S6: Comparative Table for photocurrent response of PDI-AB.**

| S. No. | Materials                                           | Responsivity (mA/W)  | References                |
|--------|-----------------------------------------------------|----------------------|---------------------------|
| 1.     | Pyrenodiindole (PDI)                                | 0.1                  | <sup>9</sup>              |
| 2.     | Pyrenodi (PDAI)                                     | 0.1                  | <sup>9</sup>              |
| 3.     | Perylene/GO                                         | 110                  | <sup>10</sup>             |
| 4.     | ITO/PDI-AB//PMMA-LiClO <sub>4</sub> -PC//PDI-AB/ITO | $0.8 \times 10^{-3}$ | <a href="#">This work</a> |

\* GO = Graphene Oxide

## 25. References:

- 1 S. Kim, C. Lee, S. Lee, S. H. Baek, D.-H. Ko and W.-S. Han, *J. Mater. Res. Technol.*, 2022, **17**, 2675–2683.
- 2 M. Z. Iqbal, M. M. Faisal, M. Sulman, S. R. Ali, A. M. Afzal, M. A. Kamran and T. Alharbi, *J. Energy Storage*, 2020, **29**, 101324.
- 3 A. Cymann-Sachajdak, M. Graczyk-Zajac, G. Trykowski and M. Wilamowska-Zawłocka, *Electrochim. Acta*, 2021, **383**, 138356.
- 4 S. Sharma, R. Soni, S. Kurungot and S. K. Asha, *J. Phys. Chem. C*, 2019, **123**, 2084–2093.
- 5 M. R. Biradar, A. M. Kale, B. C. Kim, S. V. Bhosale and S. V. Bhosale, *Energy Technol.*, 2022, **10**, 1–10.
- 6 S. Sharma, R. Soni, S. Kurungot and S. K. Asha, *Macromolecules*, 2018, **51**, 954–965.
- 7 D. Tian, H.-Z. Zhang, D.-S. Zhang, Z. Chang, J. Han, X.-P. Gao and X.-H. Bu, *RSC Adv.*, 2014, **4**, 7506.
- 8 M. E. Bhosale and K. Krishnamoorthy, *Chem. Mater.*, 2015, **27**, 2121–2126.
- 9 P. Gómez, J. Wang, M. Más-Montoya, D. Bautista, C. H. L. Weijtens, D. Curiel and R. A. J. Janssen, *Sol. RRL*, 2021, **5**, 1–11.
- 10 H.-S. Zhang, X.-M. Dong, Z.-C. Zhang, Z.-P. Zhang, C.-Y. Ban, Z. Zhou, C. Song, S.-Q. Yan, Q. Xin, J.-Q. Liu, Y.-X. Li and W. Huang, *Nat. Commun.*, 2022, **13**, 4996.
